# Supplementary material
Source: publisher site journal article supplement (http://kjim.org/upload/media/kjim-2022-129-suppl1.pdf)
Supplement: Supplementary file 1 [file kjim-2022-129-suppl1.pdf]

**Supplementary Table 1. Comparison of the mean RSV for “coronavirus” and key technologies of digital transformation in Google Trends in Korea between different stages of the COVID-19 pandemic**

| Variable                | Median (range) of RSV |                     |                   |                    |                     | <i>p</i> value |
|-------------------------|-----------------------|---------------------|-------------------|--------------------|---------------------|----------------|
|                         | Stage 1               | Stage 2             | Stage 3           | Stage 4            | Stage 5             |                |
| Coronavirus             | 16.2<br>(0–100)       | 11.6<br>(1.2–31.0)  | 7.6<br>(1.4–23.0) | 11.6<br>(3.4–42.0) | 8.2<br>(2.0–17.0)   | < 0.001        |
| Artificial intelligence | 33.3<br>(0–100)       | 36.9<br>(0–92.0)    | 37.4<br>(0–89.0)  | 33.0<br>(0–98.0)   | 29.7<br>(0–90.0)    | 0.003          |
| Cloud                   | 52.3<br>(0–100)       | 51.5<br>(16.5–91.0) | 38.9<br>(0–78.0)  | 36.0<br>(0–78.0)   | 39.7<br>(12.2–72.0) | < 0.001        |
| Big data                | 25.9<br>(0–80.0)      | 28.6<br>(0–100)     | 25.2<br>(0–69.0)  | 21.7<br>(0–67.0)   | 21.4<br>(0–68.0)    | < 0.001        |
| Metaverse <sup>a</sup>  | -                     | -                   | 7.4<br>(0–44.0)   | 26.8<br>(0–79.0)   | 43.6<br>(0–100)     | < 0.001        |
| Work from home          | 3.7<br>(0–100)        | 5.0<br>(4.8–69.0)   | 0<br>(0–19.0)     | 0<br>(0–32.0)      | 1.6<br>(0–73.7)     | < 0.001        |

RSV, relative search volume; COVID-19, coronavirus disease 2019.

<sup>a</sup>In stages 1–2, RSV values were very low, so only stages 3 to 5 were analyzed.
